# Supplementary material for: DNA damage induces nuclear actin filament assembly by Formin-2 and Spire-1/2 that promotes efficient DNA repair
Source: eLife journal article supplement (doi:10.7554/elife.07735), 2015-08-19

**fraction of Utr230-EN expressing cells**

1.0  
0.8  
0.6  
0.4  
0.2  
0.0

untreated

0.01%

0.05%

**MMS concentration**

diffuse  
nuclear

filamentous  
nuclear

cytoplasmic  
only

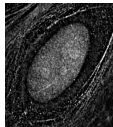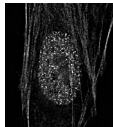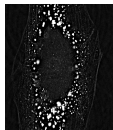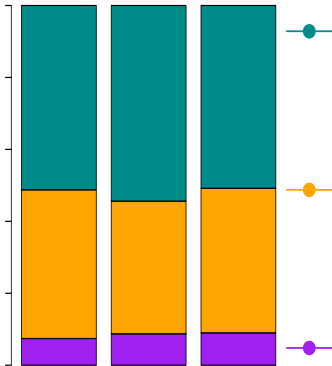

Supplement: supp [file elife-07735-supp-v1.zip]
