# Supplementary figures and images for: DNA damage induces nuclear actin filament assembly by Formin-2 and Spire-1/2 that promotes efficient DNA repair
Source: eLife journal article supplement (doi:10.7554/elife.07735), 2015-08-19

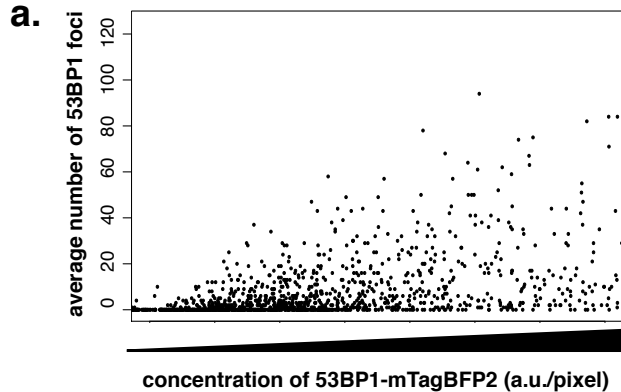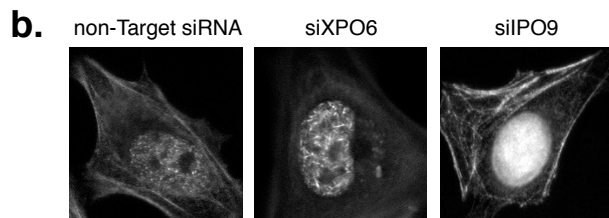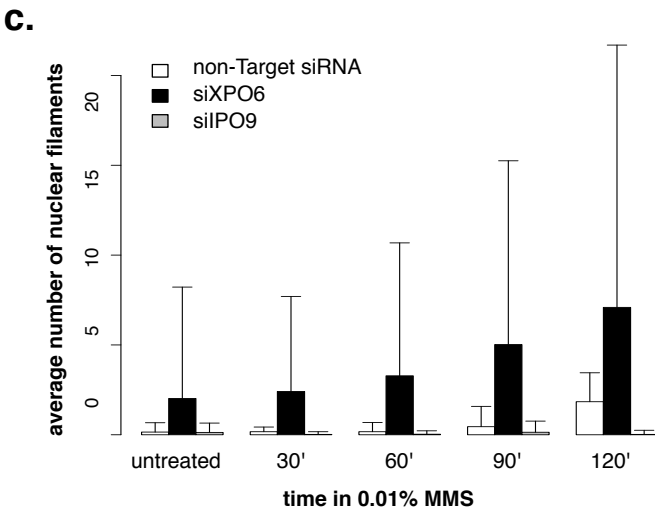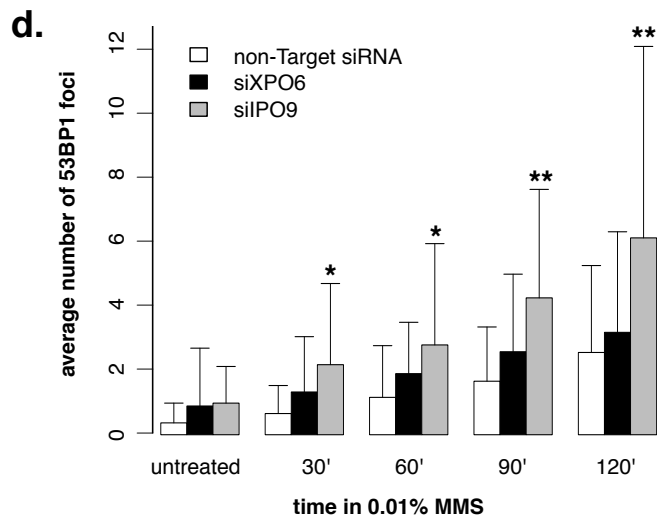

Supplement: supp [file elife-07735-supp-v1.zip]

**a.**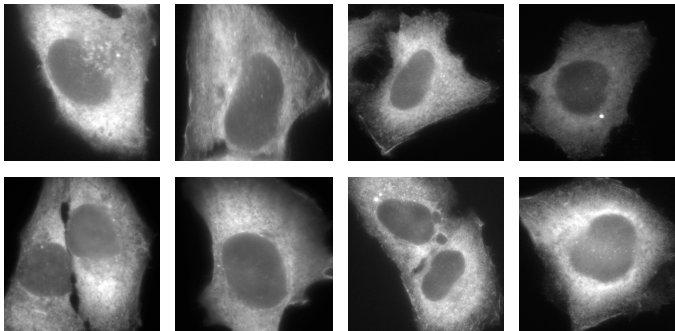**b.**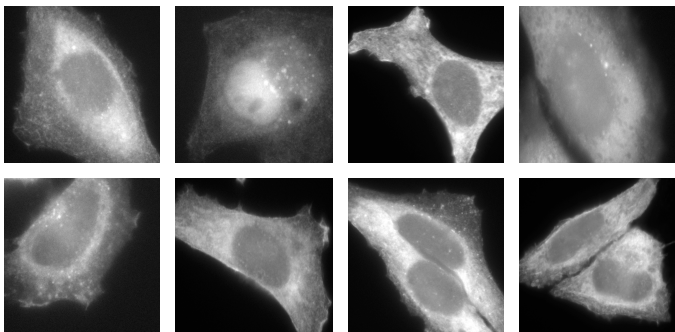**c.**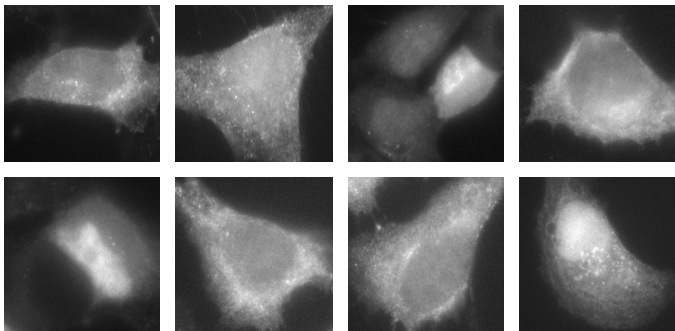

Supplement: supp [file elife-07735-supp-v1.zip]

*non-Target*  
168532  
219870

$\alpha$  Spire1

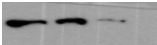

$\alpha$  tubulin

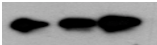

*non-Target*  
s39067  
s39068

$\alpha$  Spire2

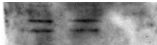

$\alpha$  tubulin

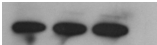

Supplement: supp [file elife-07735-supp-v1.zip]

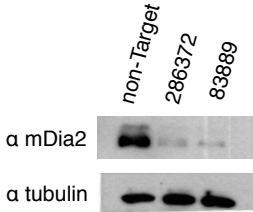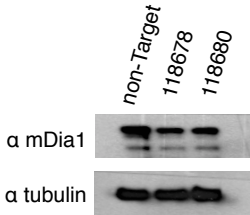

Supplement: supp [file elife-07735-supp-v1.zip]

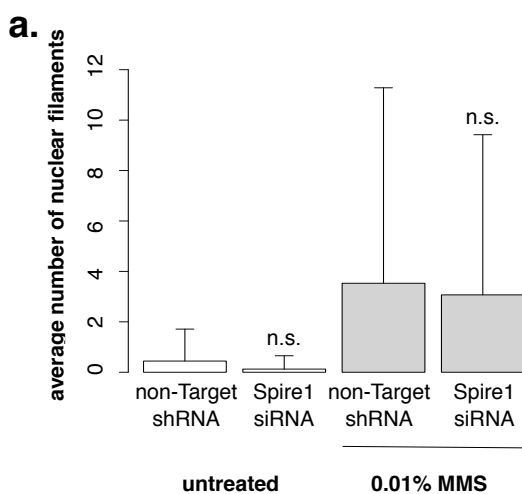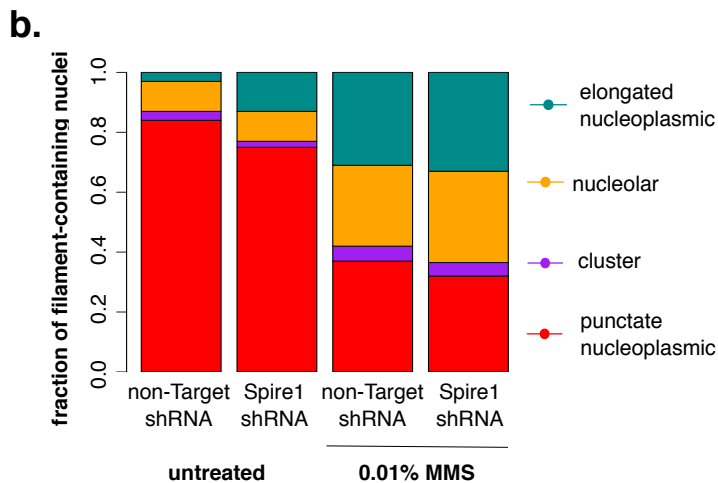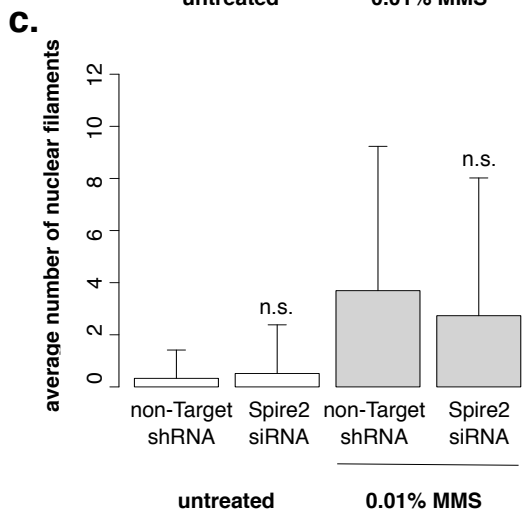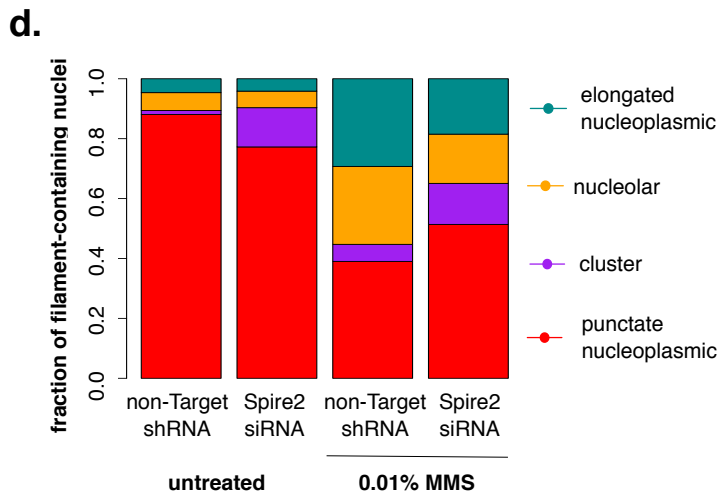

Supplement: supp [file elife-07735-supp-v1.zip]

*non-Target*

365565

365637

$\alpha$  FMN2

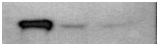

$\alpha$  tubulin

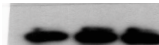

Supplement: supp [file elife-07735-supp-v1.zip]
